# Supplementary material
Source: HighWire-hosted journal article supplement (https://injuryprevention.bmj.com/highwire/filestream/160429/field_highwire_adjunct_files/3/ip-2023-044887supp004_data_supplement.pdf)

Supplementary File 4 – Most frequently reported twice-monthly participation by individual activity for Active Lives Surveys. Boxing is inclusive of boxing fitness classes, and rowing is inclusive of indoor rowing. Combined and population-weighted estimates for Active Lives Surveys 2016-17 and 2017-18.

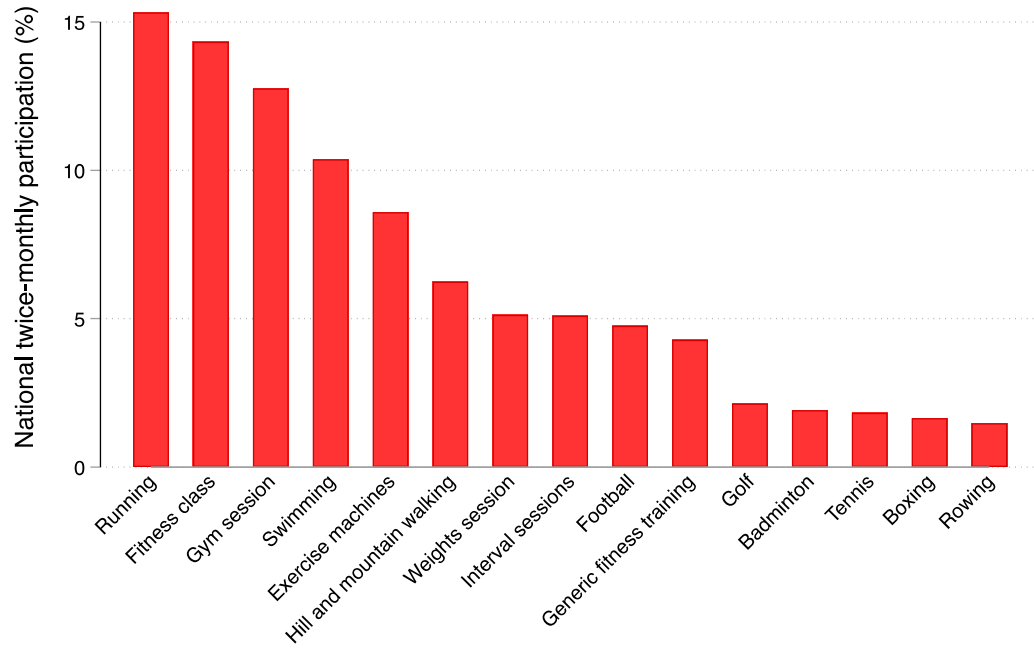

Supplement: ip-2023-044887supp004_data_supplement.pdf [file ip-2023-044887supp004_data_supplement.pdf]
